# Supplementary material for: Cancer Associated PRDM9: Implications for Linking Genomic Instability and Meiotic Recombination
Source: MDPI journal article supplement (doi:10.3390/ijms242216522), 2023-11-20
Supplement: s1 [file s1]

# 1. Algorithm in R for detecting PRDM9 motifs in breakpoint regions

```
library(BSgenome.Hsapiens.UCSC.hg19.masked)
genome <- BSgenome.Hsapiens.UCSC.hg19.masked
seqnames <- seqnames(genome)
prdm9table <- read.table("C:/Work/prdm9.txt", header =
TRUE)

for (i in 7:1024)
{

  for (seqname in seqnames)
  {
    x <- genome[[seqname]]

    (paste("Run PRDM9 no. ", seqname, i, prdm9table$PRDM9[i]))
    Lpattern <- toString(prdm9table$PRDM9[i])
    M1 <- matchPattern(Lpattern, x, max.mismatch=0, min.mismatch=0,
with.indels=FALSE, fixed=TRUE, algorithm="auto")
    #print(paste("M1 = ", M1))
    myfile <- paste("C:\\Work\\GeneScreening\\prdm9\\",
prdm9table$PRDM9[i], ".bed", sep="")
    sink(myfile, append=TRUE)
    if (length(M1) != 0)
    {
      chrvalue <- seqname
      for (k in 1:length(M1))
      {
        cat(chrvalue)
        cat("\t")
        cat(start(M1[k]))
        cat("\t")
        cat(end(M1[k]))
        cat("\t")
        cat(toString(prdm9table$PRDM9[i]))
        cat("\n")
      }
    }
    sink()

  }

  myfile2 <- paste("C:\\Work\\GeneScreening\\prdm9\\lz",
prdm9table$PRDM9[i], ".jpg", sep="")
  myfile3 <- paste("C:\\Work\\GeneScreening\\prdm9\\pt",
prdm9table$PRDM9[i], ".jpg", sep="")
  myfile4 <- paste("C:\\Work\\GeneScreening\\prdm9\\output",
prdm9table$PRDM9[i], ".txt", sep="")
library("regioner")
test <- import(myfile)
test
```

```

OV500_path <- system.file("tests", package = "rtracklayer")
OV500_bed <- file.path(OV500_path, "OV500.bed")
OV500 <- import(OV500_bed)
OV500
pt <- overlapPermTest(A=OV500, B=test, ntimes=700)
pt
lz <- localZScore(pt=pt, A=OV500, B=test)
jpeg(myfile2)
plot(lz)
dev.off()
jpeg(myfile3)
plot(pt)
dev.off()
output <- overlapRegions(test, OV500)
output
write.table(output, myfile4, append = FALSE, quote = TRUE, sep = " ",
  eol = "\n", na = "NA", dec = ".", row.names = TRUE,
  col.names = TRUE, qmethod = c("escape", "double"),
  fileEncoding = "")
}

```

## 2. Script in C# for detecting all possible variations of PRDM9 degenerate sequence motif

```

#include <stdio.h>
#include <stdlib.h>
#include <string.h>
int main(int argc *argv[])
{
    char num[10];
    num[0]= 'A';
    num[1]= 'G';
    num[2]= 'T';
    num[3]= 'C';
    int i,j,k,l,m;
    int count=0;
    for (i = 0; i <= 3; i++){
        for (j = 0; j <=3; j++) {
            for(k = 0; k <= 3; k++) {
                for ( l = 0; l <= 3; l++) {
                    for (m = 0; m <= 3; m++) {
                        printf("CC%cCC%cT%c%cCC%cC \n", num[i], num[j],
num[k], num[l], num[m]
                        );
                        count++;
                    }
                }
            }
        }
    }
}

```

```
        }  
    }  
}  
}  
}  
printf("total combinations %d ", count);  
return 0;  
}
```
