# Supplementary figures and images for: Cancer Associated PRDM9: Implications for Linking Genomic Instability and Meiotic Recombination
Source: MDPI journal article supplement (doi:10.3390/ijms242216522), 2023-11-20

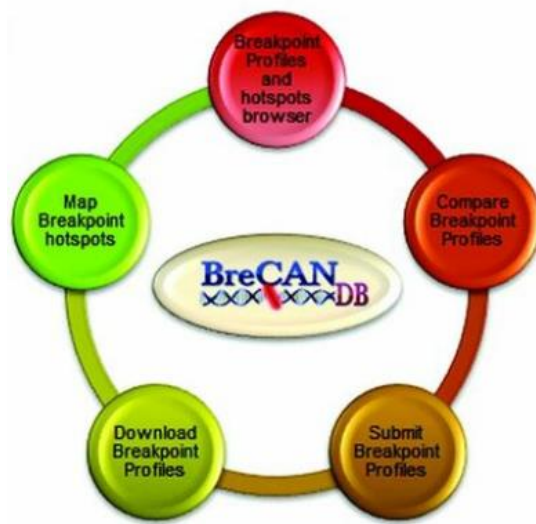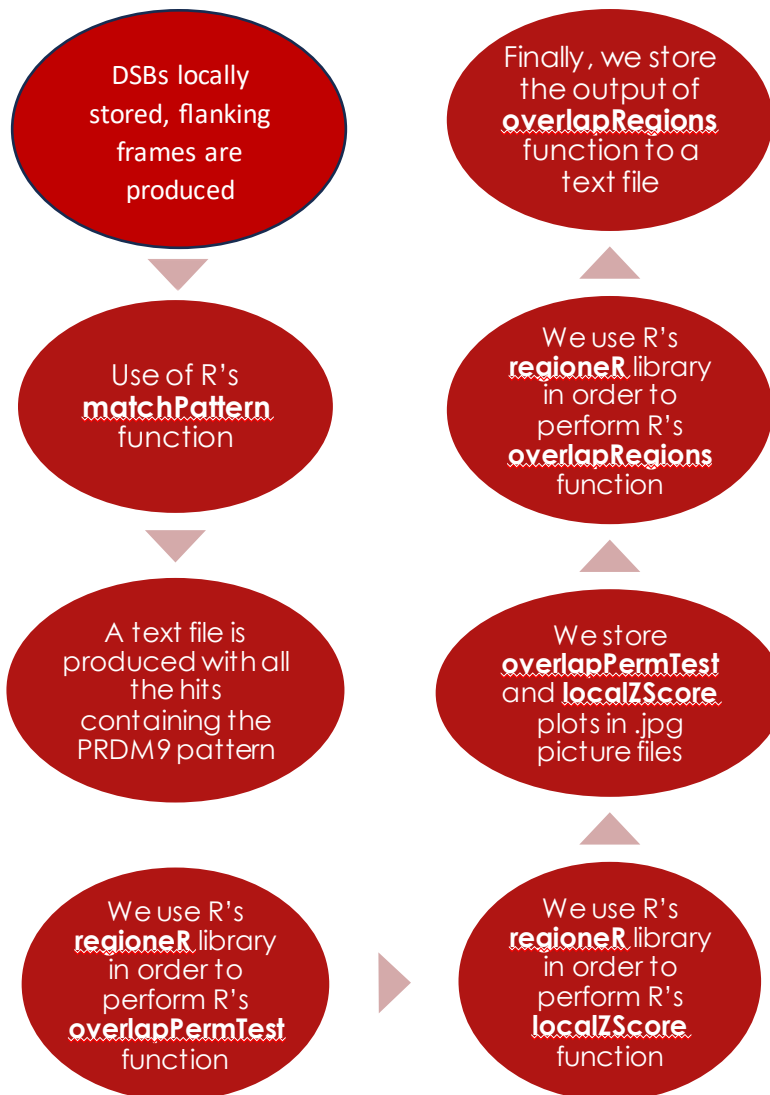

Supplement: s1 [file s1]
